# Supplementary material
Source: publisher figshare collection journal article supplement (https://acs.figshare.com/ndownloader/files/28880676)
Supplement: Supplementary file 1 [file 28880676]

## **Supporting Information**

### **3D Printed Topological MoS<sub>2</sub>/MoSe<sub>2</sub> Heterostructures for**

### **Macroscale Superlubricity**

Yu Zhao,<sup>†</sup> Hui Mei,<sup>\*,†</sup> Peng Chang,<sup>†</sup> Yubo Yang,<sup>†</sup> Weifeng Huang,<sup>‡</sup> Ying Liu,<sup>‡</sup> Laifei Cheng,<sup>†</sup> Litong Zhang<sup>†</sup>

<sup>†</sup> Science and Technology on Thermostructural Composite Materials Laboratory,  
School of Materials Science and Engineering, Northwestern Polytechnical University,  
Xi'an, Shaanxi 710072, PR China

<sup>‡</sup> State Key Laboratory of Tribology, Department of Mechanical Engineering, Tsinghua  
University, Beijing 100084, PR China

\* Email address: [meihui@nwpu.edu.cn](mailto:meihui@nwpu.edu.cn) (H. Mei)

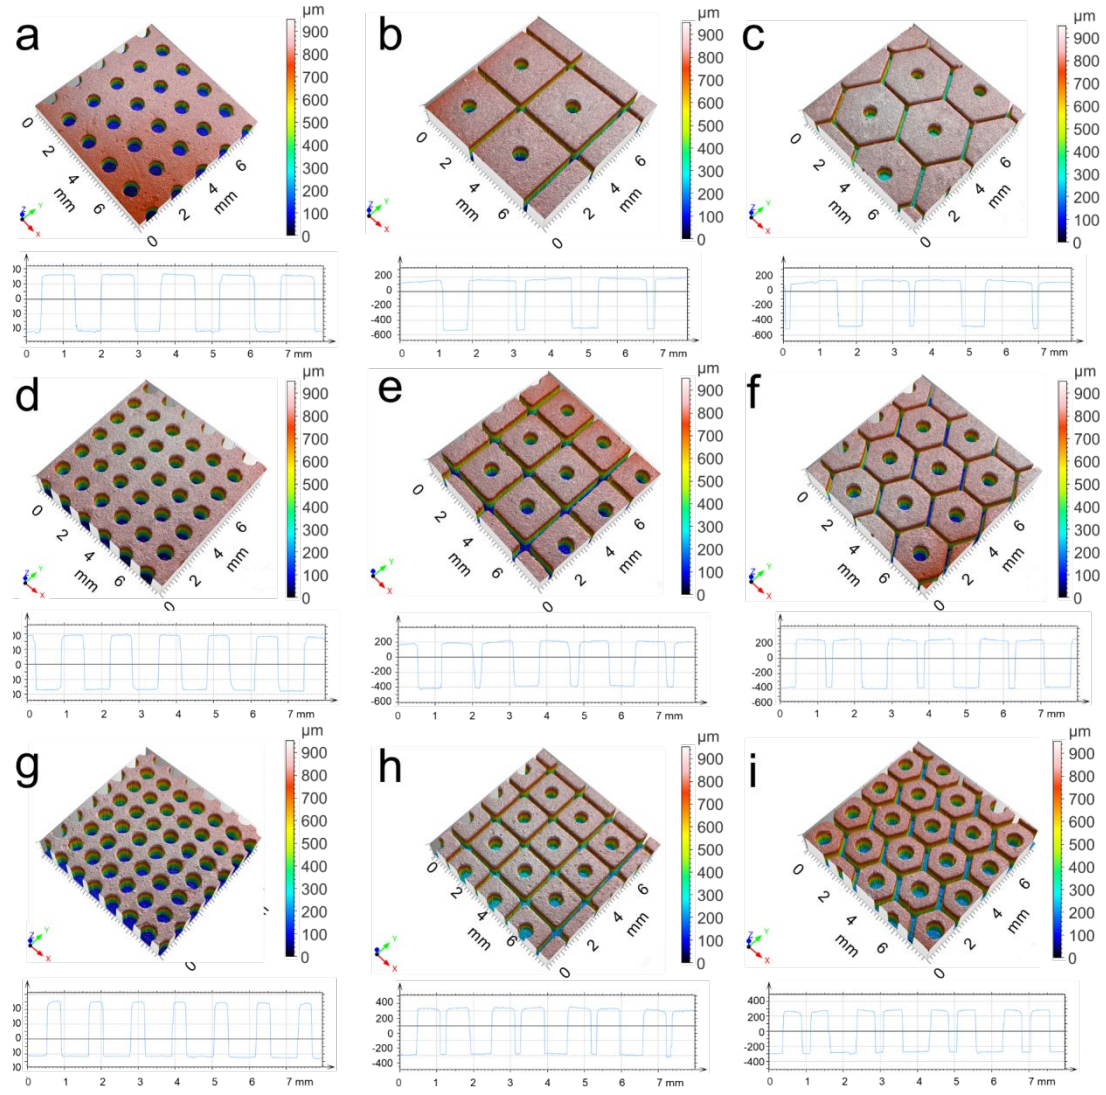

**Figure S1.** 3D morphologies of bioinspired topological structures with different texture densities. (a, d, g) C structure with texture densities of 20%, 30% and 40%, respectively. (b, e, h) CS structure with texture densities of 20%, 30% and 40%, respectively. (c, f, i) CH structure with texture densities of 20%, 30% and 40%, respectively.

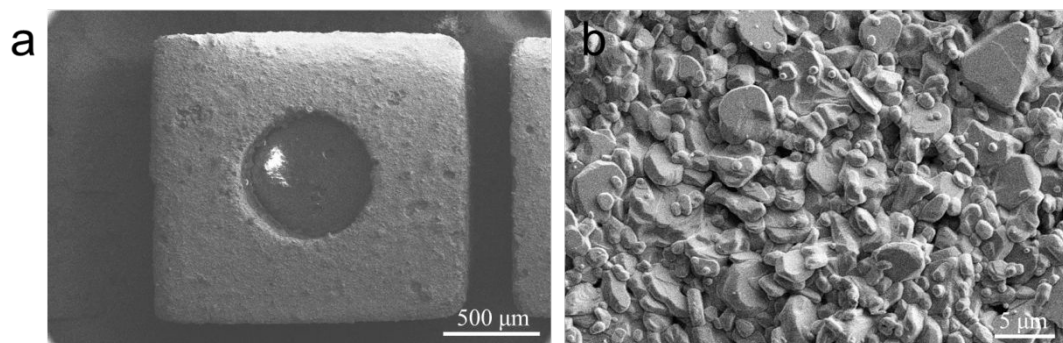

**Figure S2.** SEM images of 3D printed Al<sub>2</sub>O<sub>3</sub> topological structures. (a) low-magnification. (b) high-magnification.

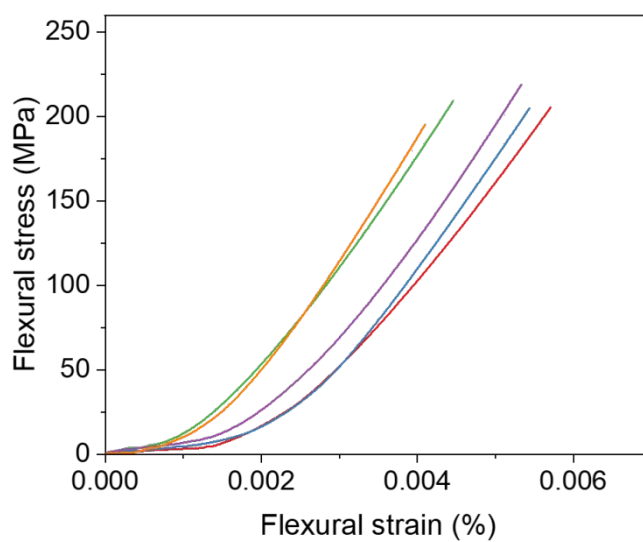

**Figure S3.** Flexural properties of 3D printed Al<sub>2</sub>O<sub>3</sub> topological structures.

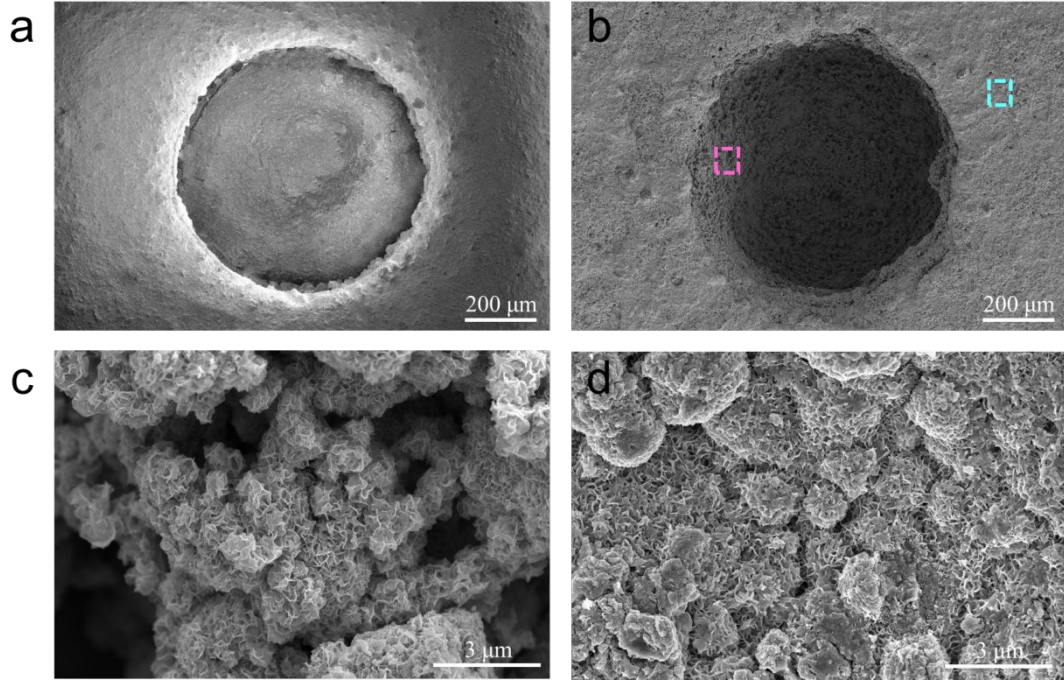

**Figure S4.** SEM images of bioinspired topological structures before and after introducing MoS<sub>2</sub>/MoSe<sub>2</sub> heterostructures. (a) Printed pure Al<sub>2</sub>O<sub>3</sub> topological structures. (b) Al<sub>2</sub>O<sub>3</sub>/MoS<sub>2</sub>/MoSe<sub>2</sub> composites. (c) MoS<sub>2</sub>/MoSe<sub>2</sub> heterostructures in the pits (the red rectangle in b). (d) MoS<sub>2</sub>/MoSe<sub>2</sub> heterostructures on the surface (the blue rectangle in b).

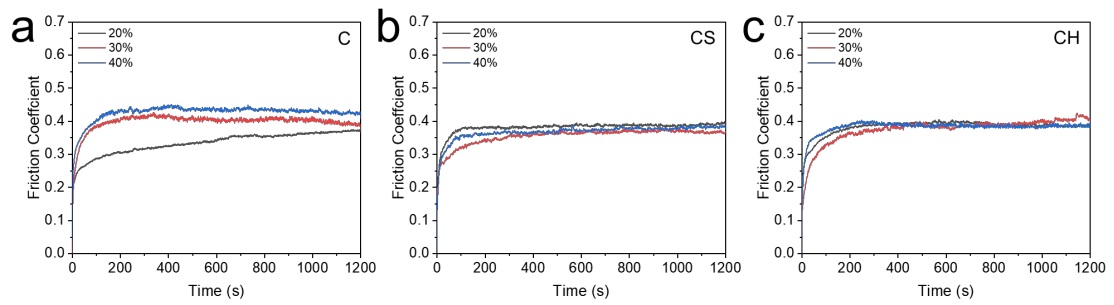

**Figure S5.** Friction coefficient curves of structures C (a), CS (b) and CH (c) under 2 N.

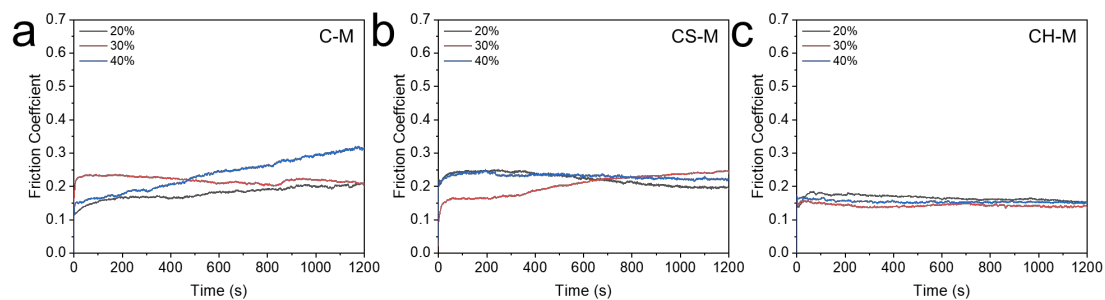

**Figure S6.** Friction coefficient curves of composites C-M (a), CS-M (b) and CH-M (c) under 2 N.

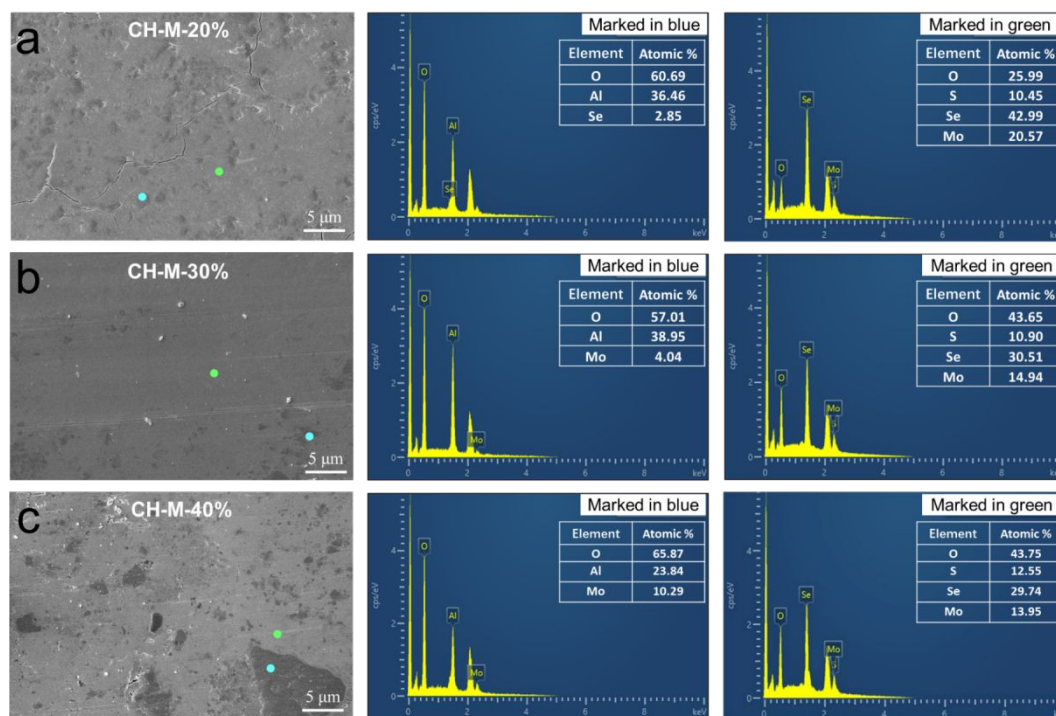

**Figure S7.** SEM images and corresponding EDS spectra of the wear tracks of CH-M composites with different texture densities (measured at 5 N). (a) CH-M-20%. (b) CH-M-30%. (c) CH-M-40%.

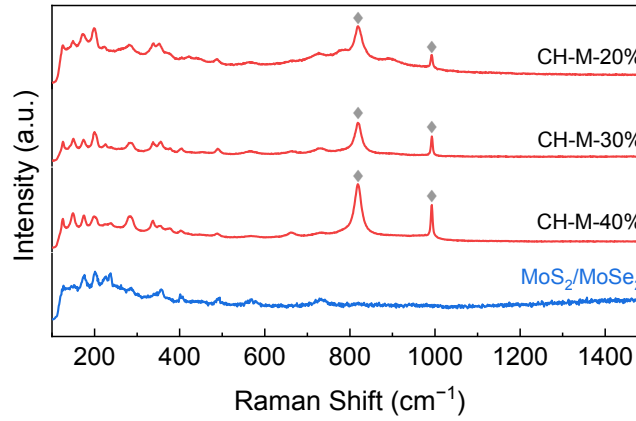

**Figure S8.** Raman spectra taken from the wear tracks of CH-M composites with different texture densities (measured under 5 N).

**Table S1.** A comparison of mechanical properties between printed topological structures and other recently reported ceramic materials.

| Materials                                                           | Methods               | Flexural strength (MPa) | Hardness        | Ref       |
|---------------------------------------------------------------------|-----------------------|-------------------------|-----------------|-----------|
| Topological Al <sub>2</sub> O <sub>3</sub> structures               | DLP printing          | 227.62                  | 16.23 ± 1.7 GPa | This work |
| $\alpha$ -Al <sub>2</sub> O <sub>3</sub>                            | Inkjet printing       | 49.4                    | 245 HV          | [23]      |
| SiOC                                                                | DLP printing          | -                       | 2.11 GPa        | [42]      |
| C/Si <sub>3</sub> N <sub>4</sub>                                    | PIP                   | 207                     | -               | [37]      |
| SiC <sub>f</sub> /HfC-SiC                                           | PIP                   | 108.6                   | -               | [38]      |
| SiC/Mo/CaF <sub>2</sub>                                             | Hot pressed Sintering | -                       | 731 HV          | [39]      |
| Al <sub>2</sub> O <sub>3</sub> /MoS <sub>2</sub> -BaSO <sub>4</sub> | SPS                   | -                       | 15 ± 0.5 GPa    | [40]      |
| ZrB <sub>2</sub>                                                    | SPS                   | -                       | 13.2 ± 1 GPa    | [41]      |

PIP: precursor infiltration and pyrolysis. SPS: spark-plasma-sintering.
